# Supplementary material for: Final Pre-40S Maturation Depends on the Functional Integrity of the 60S Subunit Ribosomal Protein L3
Source: PubMed Central journal article supplement (PMC3945201; doi:10.1371/journal.pgen.1004205), 2014-03-06
Supplement: pgen.1004205.s006.pdf [file pgen.1004205.s006.pdf]

**A****Wild type**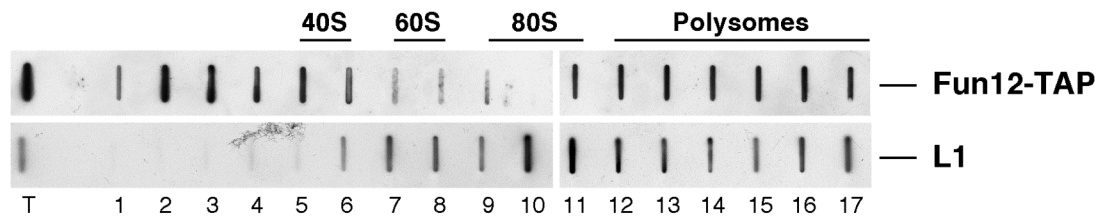**W255C**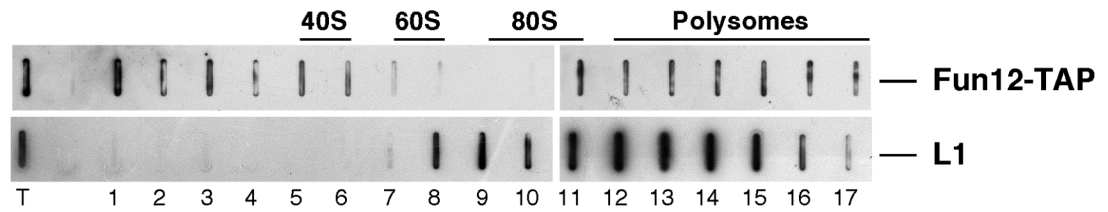**B****Wild type**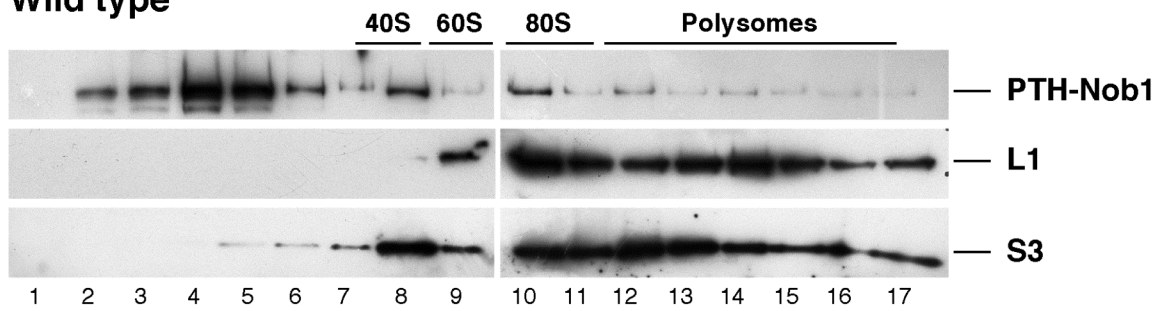**W255C**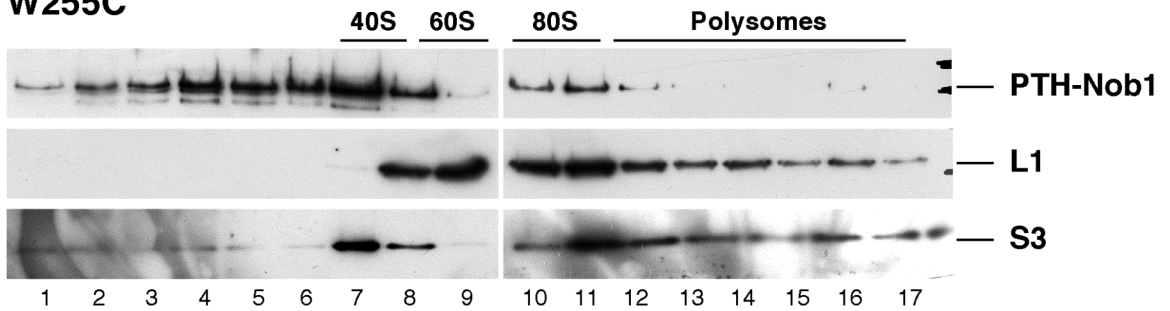**Figure S6. García-Gómez et al.**
