# Supplementary material for: Final Pre-40S Maturation Depends on the Functional Integrity of the 60S Subunit Ribosomal Protein L3
Source: PubMed Central journal article supplement (PMC3945201; doi:10.1371/journal.pgen.1004205), 2014-03-06
Supplement: pgen.1004205.s010.pdf [file pgen.1004205.s010.pdf]

**Table S2. Plasmids used in this study**

| <b>Name</b>                                      | <b>Relevant features</b>                 | <b>Reference</b> |
|--------------------------------------------------|------------------------------------------|------------------|
| YCplac111                                        | <i>CEN, LEU2</i>                         | [65]             |
| YCplac111-RPL3                                   | <i>CEN, LEU2, RPL3</i>                   | [29]             |
| YCplac111-rpl3-W255C                             | <i>CEN, LEU2, rpl3[W255C]</i>            | This study       |
| YCplac111-rpl3-Q371H<br>(YCplac111-rpl3-101)     | <i>CEN, LEU2, rpl3[Q371H]</i>            | [29]             |
| YCplac111-rpl3-K30E<br>(YCplac111-rpl3-102)      | <i>CEN, LEU2, rpl3[K30E]</i>             | [29]             |
| YCplac111-rpl3-P257T                             | <i>CEN, LEU2, rpl3[P257T]</i>            | This study       |
| YCplac111-rpl3-I282T                             | <i>CEN, LEU2, rpl3[I282T]</i>            | This study       |
| YCplac111-rpl3-W255C,P257T<br>(YCplac111-mak8-1) | <i>CEN, LEU2, rpl3[W255C, P257T]</i>     | This study       |
| YCplac22-RPL3                                    | <i>CEN, TRP1, RPL3</i>                   | [29]             |
| YCplac22-rpl3-K30E                               | <i>CEN, TRP1, rpl3[K30E]</i>             | [[29]            |
| YCplac22-rpl3-W255C                              | <i>CEN, TRP1, rpl3[W255C]</i>            | This study       |
| YCplac22-rps14A-R136A                            | <i>CEN, TRP1, rps14A[R136A]</i>          | This study       |
| YCplac33-cdc33-42                                | <i>CEN, URA3, cdc33[E73K, G179D]</i>     | [63]             |
| pRS316-RPL25-eGFP                                | <i>CEN, URA3, RPL25-eGFP</i>             | [66]             |
| pRS316-RPS2-eGFP                                 | <i>CEN, URA3, RPS2-eGFP</i>              | [67]             |
| pRS314-DsRed-NOP1                                | <i>CEN, TRP1, DsRed-NOP1</i>             | [68]             |
| pRS415-PTH-NOB1                                  | <i>CEN, LEU2, PTH-NOB1</i>               | [26]             |
| pHT4467 $\Delta$ -RPL3                           | <i>CEN6 (instable), URA3, ADE3, RPL3</i> | This study       |
| YCplac33-RPL10                                   | <i>CEN, URA3, RPL10</i>                  | This study       |
| YCplac111-RPL10                                  | <i>CEN, LEU2, RPL10</i>                  | This study       |
| YCplac111-rpl10-A106R                            | <i>CEN, LEU2, rpl10[A106R]</i>           | This study       |
| YCplac111-rpl10-L103C                            | <i>CEN, LEU2, rpl10[L103C]</i>           | This study       |
| YCplac111-rpl10-L103S                            | <i>CEN, LEU2, rpl10[L103S]</i>           | This study       |
