# Supplementary material for: Final Pre-40S Maturation Depends on the Functional Integrity of the 60S Subunit Ribosomal Protein L3
Source: PubMed Central journal article supplement (PMC3945201; doi:10.1371/journal.pgen.1004205), 2014-03-06
Supplement: pgen.1004205.s011.pdf [file pgen.1004205.s011.pdf]

**Table S3. Oligonucleotides used in this study**

---

| <b>Name</b>                               | <b>5'-3' Sequence</b>                                   |
|-------------------------------------------|---------------------------------------------------------|
| Probe b (18S)                             | CATGGCTTAATCTTTGAGAC                                    |
| Probe c (3-D/A <sub>2</sub> )             | GACTCTCCATCTCTTGTCTTCTTG                                |
| Probe c' (ITS1RT)                         | CCATCTCTTGTCTTCTTGCCAG                                  |
| Probe d (A <sub>2</sub> /A <sub>3</sub> ) | TGTTACCTCTGGGCCC                                        |
| Probe e (5.8S)                            | TTTCGCTGCGTTCTTCATC                                     |
| Probe f (E/C <sub>2</sub> )               | GGCCAGCAATTTCAAGTTA                                     |
| Probe g (C <sub>1</sub> /C <sub>2</sub> ) | GAACATTGTTGCGCTAGA                                      |
| Probe h (25S)                             | CTCCGCTTATTGATATGC                                      |
| Probe 5S                                  | GGTCACCCACTACACTACTCGG                                  |
| Probe scR1                                | CCCACCAGAAAGCCATTACAGCC                                 |
| Cy3-labelled probe<br>(FISH/ITS1-1)       | 5'-Cy3-ATGCTCTTGCCAAAACAAAAAATCCATTTTCAAATTATTAAATTTCTT |

---
