# Supplementary material for: Final Pre-40S Maturation Depends on the Functional Integrity of the 60S Subunit Ribosomal Protein L3
Source: PubMed Central journal article supplement (PMC3945201; doi:10.1371/journal.pgen.1004205), 2014-03-06
Supplement: pgen.1004205.s012.pdf [file pgen.1004205.s012.pdf]

**Table S4. Doubling times of the strains under the experimental conditions described in Figure 5**

| Strains (relevant genotype), media <sup>(a)</sup> | Doubling time (min) |
|---------------------------------------------------|---------------------|
| <b>Figure 5A:</b>                                 |                     |
| Wild type, zero time-point                        | 135                 |
| <i>rp13</i> [W255C], zero time-point              | 230                 |
| <b>Figure 5B:</b>                                 |                     |
| Wild type                                         | 135                 |
| <i>rp13</i> [W255C]                               | 230                 |
| <i>cdc33-42</i>                                   | 145                 |
| <i>rp13</i> [W255C] <i>cdc33-42</i>               | 260                 |
| <b>Figure 5C:</b>                                 |                     |
| Wild type, YPD                                    | 135                 |
| <i>rp13</i> [W255C], YPD                          | 230                 |
| Wild type, YPGal                                  | 190                 |
| <i>rp13</i> [W255C], YPGal                        | 270                 |
| Wild type, SD                                     | 200                 |
| <i>rp13</i> [W255C], SD                           | 290                 |
| Wild type, SGly                                   | 310                 |
| <i>rp13</i> [W255C], SGly                         | 400                 |

<sup>(a)</sup> All strains used belong to the W303 background (see legend to Figure 5 and Table S1). Cultures were grown at 30 °C. Growth was measured as the OD<sub>600</sub>. Data are the average of four independent experiments. Standard deviation was always less than 10 min.
