# Supplementary material for: Final Pre-40S Maturation Depends on the Functional Integrity of the 60S Subunit Ribosomal Protein L3
Source: PLOS journal article supplement (doi:10.1371/journal.pgen.1004205), 2014-03-06
Supplement: S2 (10.1371/journal.pgen.1004205.s002) [file journal.pgen.1004205.s002]

**A**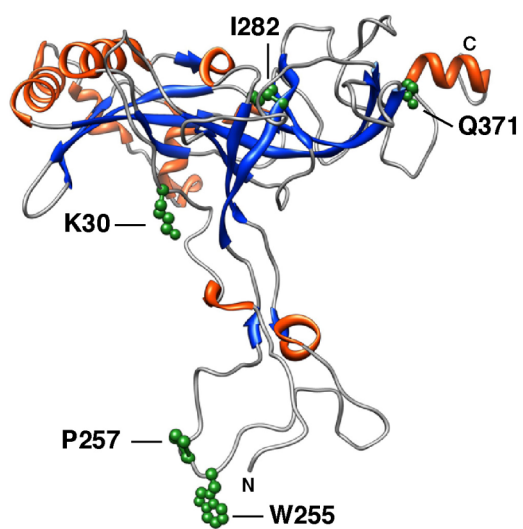**B**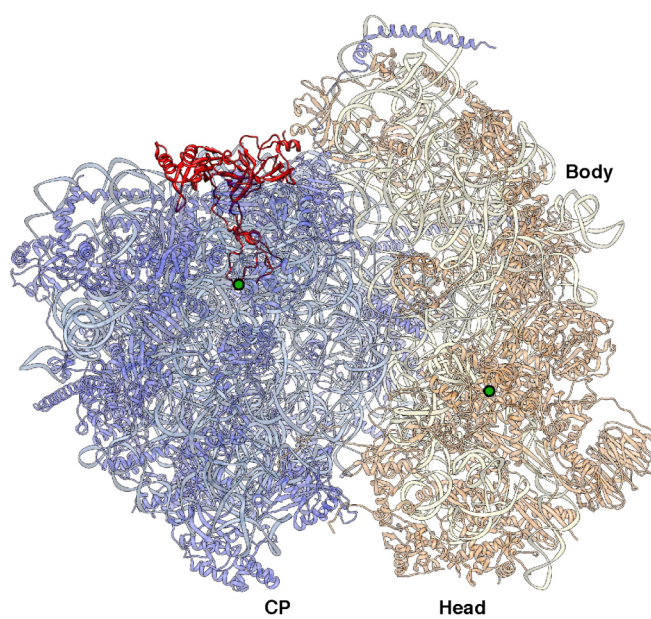

Figure S2. García-Gómez et al.
